# Supplementary material for: FOXD1 is a prognostic biomarker and correlated with macrophages infiltration in head and neck squamous cell carcinoma
Source: PubMed Central journal article supplement (PMC8255535; doi:10.1042/bsr20202929), 2021-07-02
Supplement: BSR-2020-2929_supp.pdf [file BSR-2020-2929_supp.pdf]

## Supplementary figure legends

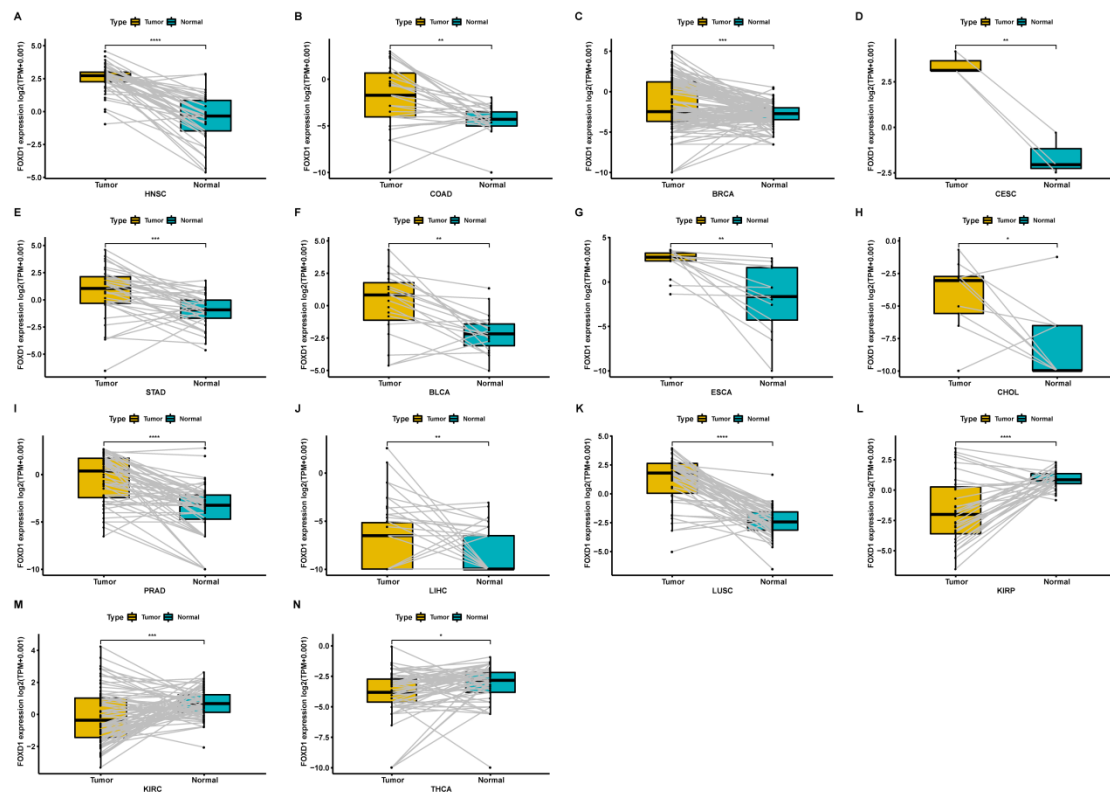

**Sup-Figure 1: Pan-cancer FOXD1 expression analysis in paired tumor and normal tissues in TCGA.** (A-N), FOXD1 expression in indicated paired tumor and normal tissues in pan-cancer data of TCGA. Gray lines connect paired tissues. Data were shown as mean  $\pm$  SD. \*p < 0.05, \*\*p < 0.01, \*\*\*p < 0.001, \*\*\*\*p < 0.0001.

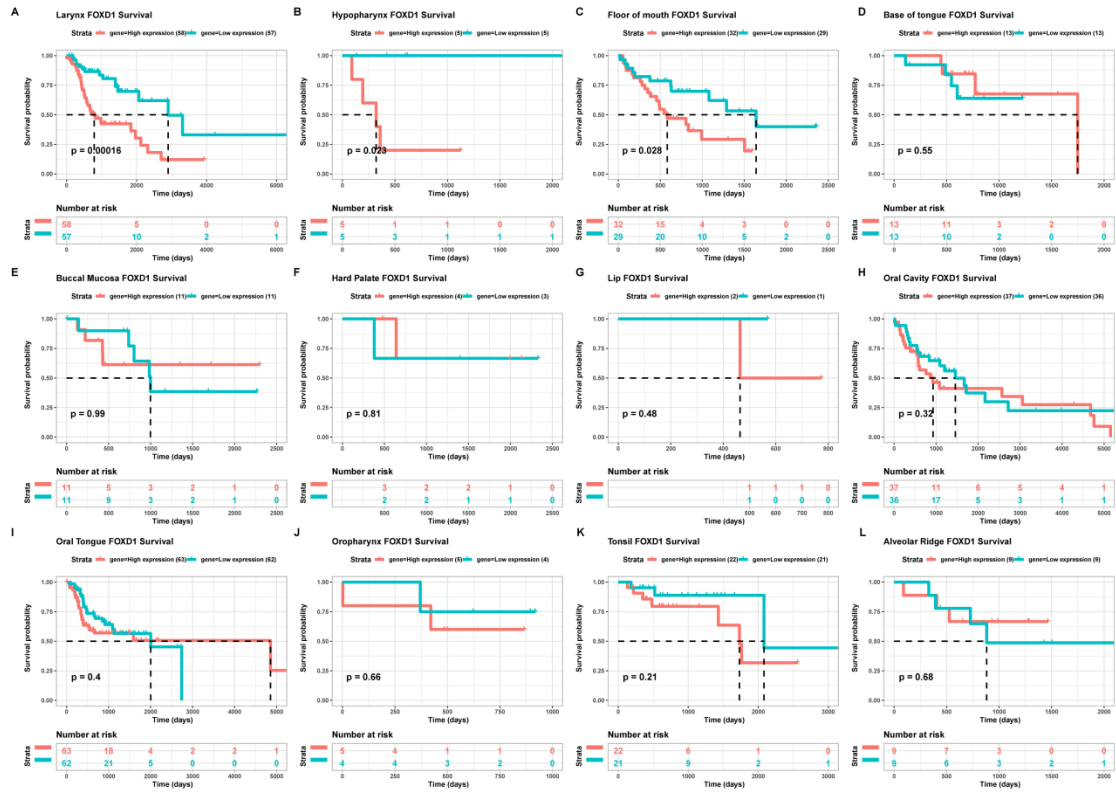

**Sup-Figure 2: Correlation analysis of FOXD1 in HNSC.**

(A-L) Kaplan–Meier analysis of OS in 16 various tumor locations of HNSC, group division was based on the median of FOXD1 expression.

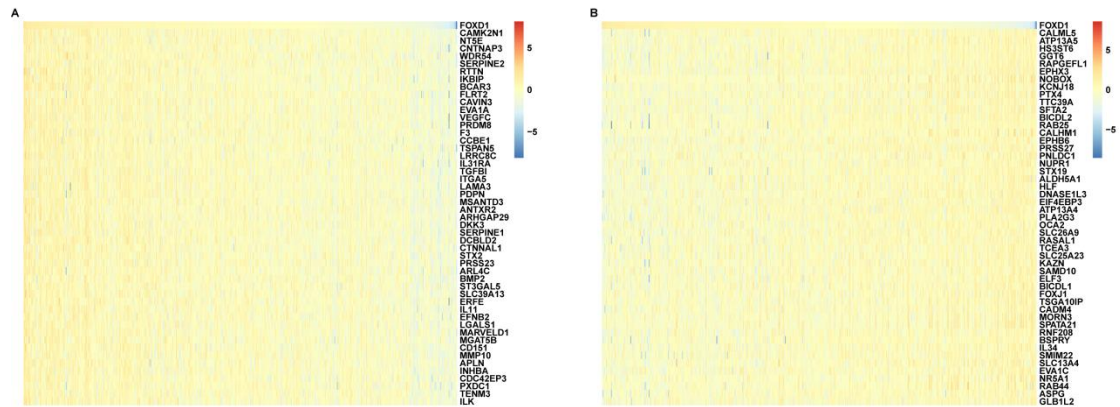

**Sup-Figure 3: Correlation analysis of FOXD1 in HNSC.**

(A), Top 50 genes most positively associated with FOXD1 were shown in heatmap.

(B), Top 50 genes most negatively associated with FOXD1 were shown in heatmap.
